# Supplementary material for: Gaps and roadmap of novel neuromodulation targets for treatment of gait in Parkinson’s disease
Source: PubMed Central journal article supplement (PMC8752758; doi:10.1038/s41531-021-00276-6), 2022-01-11
Supplement: 41531_2021_276_MOESM1_ESM.pdf [file 41531_2021_276_MOESM1_ESM.pdf]

**\* Supplementary Information. Neuromodulation of Gait Study Group from  
Movement Disorders Society**

AIDakheel, Amal; Blahak, Christian; Bloem, Bastiaan R.; Butson, Christopher; Capato,  
Tamine T.C.; Chabardes, Stephan; Coyne, Terry J.; Debu, Bettina; Grabli, David;  
Gulberti, Alessandro; Foltynie, Thomas; Fonoff, Eric; Foote, Kelly; Fraix, Valerie;  
Haas, Aline; Hamani, Clement; Hirsch, Etienne; Horak, Fay; Johnson, Kara; Kalia,  
Suneil K.; Kang, Un; Kosutzka, Zuzana; Lozano, Andres M.; Mahant, Neil; Okun,  
Michael; Ostrem, Jill; Prakash, Neha; Potter-Nerger, Monika; Sarangmat, Nagaraja;  
Silburn, Peter A.; Schrader, Christoph; Stein, John; Stefani, Alessandro; Tai, Chun-  
Hwei; Tai, Yen; Thevathasan, Wesley; Veletzas, Ioannis; Wagner, Jonas; Welter,  
Marie-Laure; Zrinzo, Ludvic.
